# Supplementary material for: Protein SUMOylation regulates insulin secretion at multiple stages
Source: PubMed Central journal article supplement (PMC6393506; doi:10.1038/s41598-019-39681-6), 2019-02-27
Supplement: 41598_2019_39681_MOESM1_ESM.pdf [file 41598_2019_39681_MOESM1_ESM.pdf]

# Protein SUMOylation regulates insulin secretion at multiple stages

**Jeffrey S. Davey, Ruth E. Carmichael and Tim J. Craig\***

Centre for Research in Biosciences, University of the West of England, Coldharbour Lane, Frenchay, Bristol, BS16 1QY, U.K.

\*Please address correspondence to: [tim.craig@uwe.ac.uk](mailto:tim.craig@uwe.ac.uk)

## Supplementary Information

# Supplementary Figure 1 – Full Length Western blots

From figure 3C

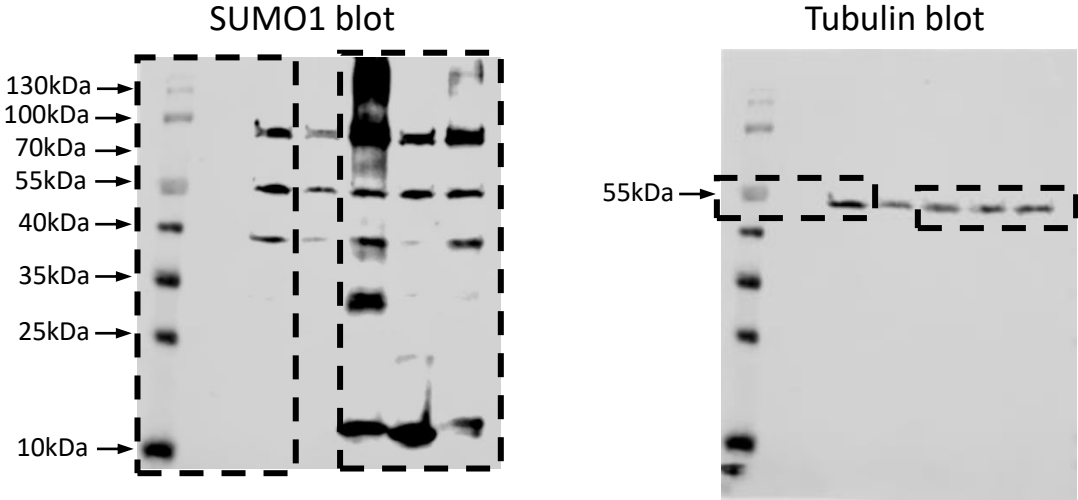

From figure 4A

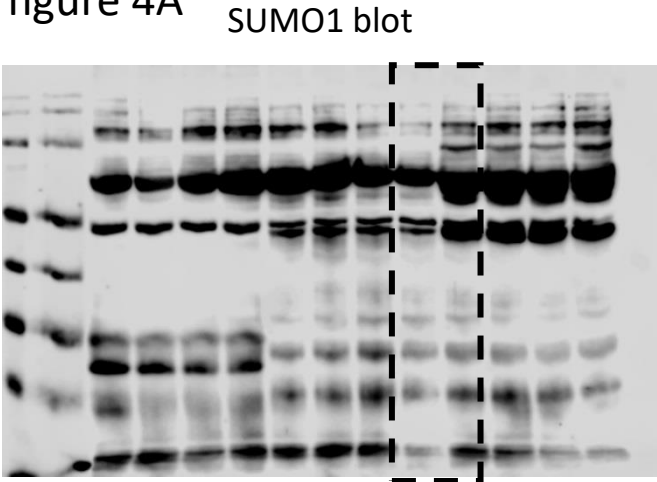

From figure 5A,B

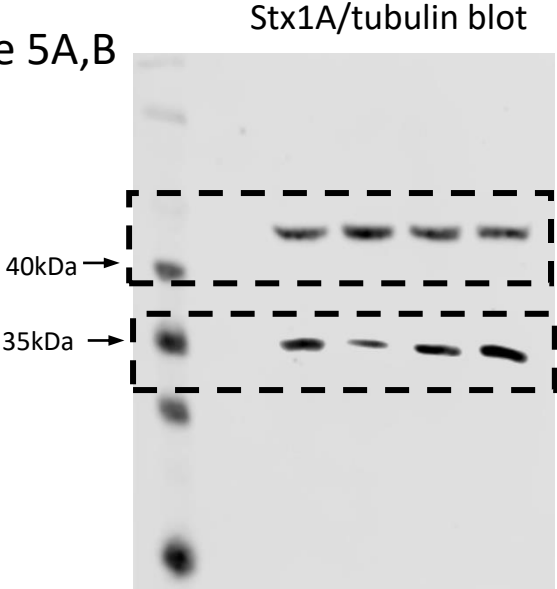

## Supplementary Figure Legends

### Supplementary Figure 1 - Full length blots

Full length, uncropped blots for all figures. Cropped areas shown in figures are indicated with dashed boxes.
